# Supplementary material for: Combustion of lean methane over Co3O4 catalysts prepared with different cobalt precursors
Source: Royal Society of Chemistry journal article supplement (doi:10.1039/c9ra09544f), 2020-01-01
Supplement: c9ra09544f1.pdf [file c9ra09544f1.pdf]

Electronic Supplementary Information

For

Combustion of lean methane over  $\text{Co}_3\text{O}_4$  catalysts prepared with different  
cobalt precursors

Yifan Zheng,<sup>ab</sup> Yueqin Yu,<sup>ab</sup> Huan Zhou,<sup>b</sup> Wanzhen Huang<sup>b</sup> and Zhiying Pu<sup>\*ab</sup>

<sup>a</sup> *College of Chemical Engineering, Zhejiang University of Technology, Zhejiang  
University of Technology, Hangzhou 310014, China*

<sup>b</sup> *Research Center of Analysis and Measurement, Zhejiang University of Technology,  
Hangzhou 310014, China.*

Corresponding author: [Zhiying Pu](#)

*E-mail address:* [zhiyingpu@zjut.edu.cn](mailto:zhiyingpu@zjut.edu.cn)

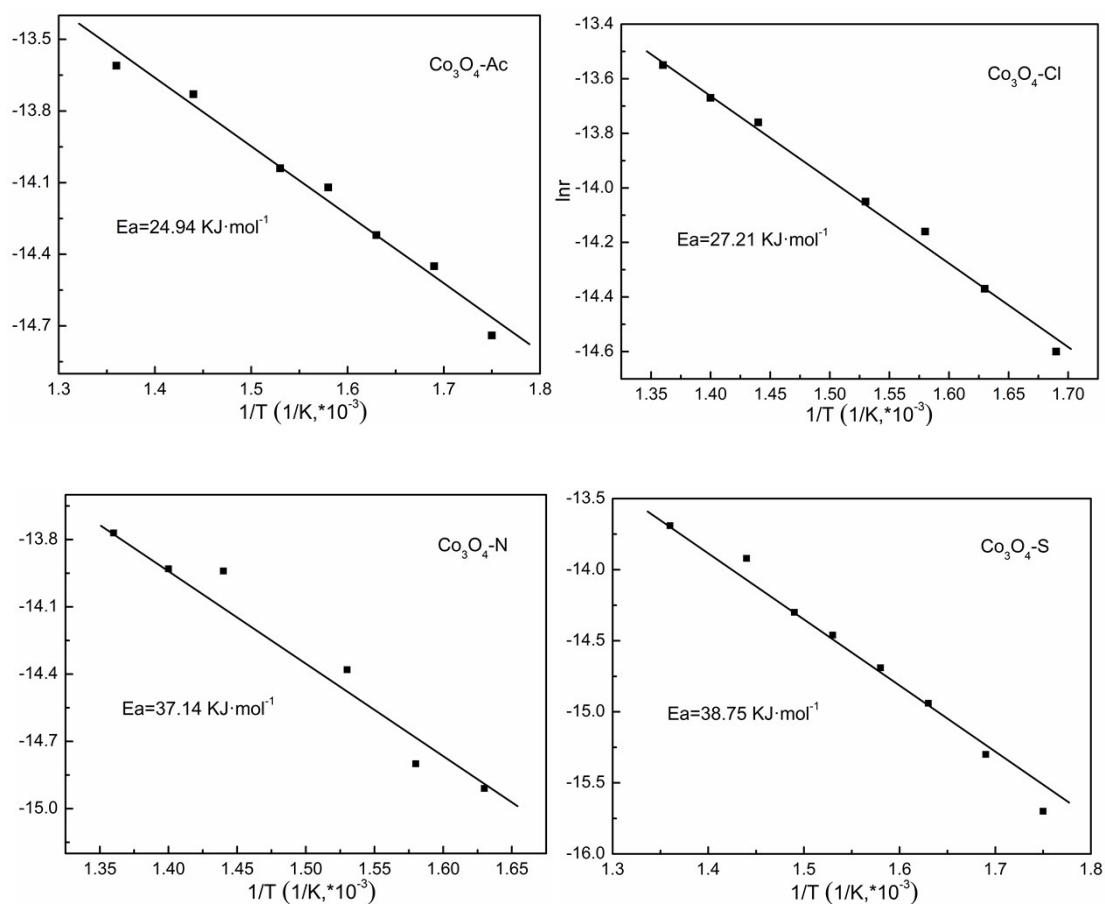

**Fig. S1** Arrhenius plots of  $\ln r$  versus  $1/T$  for  $\text{Co}_3\text{O}_4$  catalysts prepared with different cobalt precursors

The activation energy ( $E_a$ ) can be obtained from the slope of the linear plot of  $\ln r$  versus  $1/T$ . The order of the activation energy for all the catalysts is as follows:  $\text{Co}_3\text{O}_4\text{-Ac} < \text{Co}_3\text{O}_4\text{-Cl} < \text{Co}_3\text{O}_4\text{-N} < \text{Co}_3\text{O}_4\text{-S}$ , which is in well agreement with the catalytic activity. Obviously,  $\text{Co}_3\text{O}_4\text{-Ac}$  catalyst possesses lower activation energy ( $E_a$  is  $24.94 \text{ kJ}\cdot\text{mol}^{-1}$ ) than the other catalysts, suggesting that the catalytic oxidation reaction on  $\text{Co}_3\text{O}_4\text{-Ac}$  could be more easily initiated, which could enhance the catalytic activity for methane combustion.

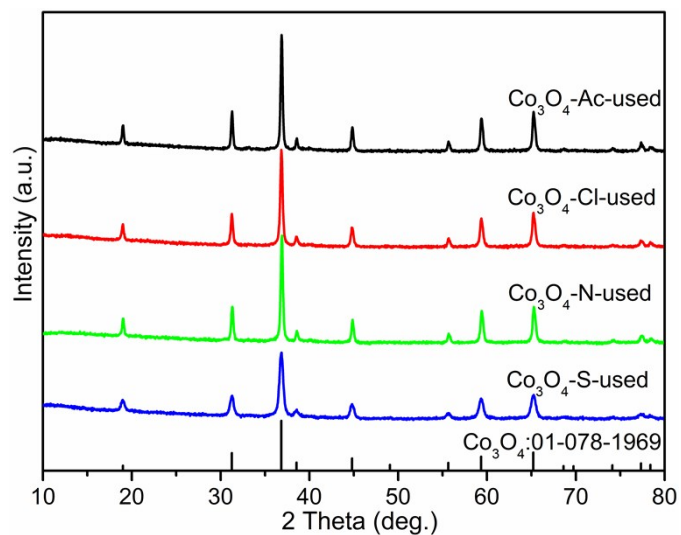

**Fig. S2** XRD patterns of used catalysts (after four consecutive runs)

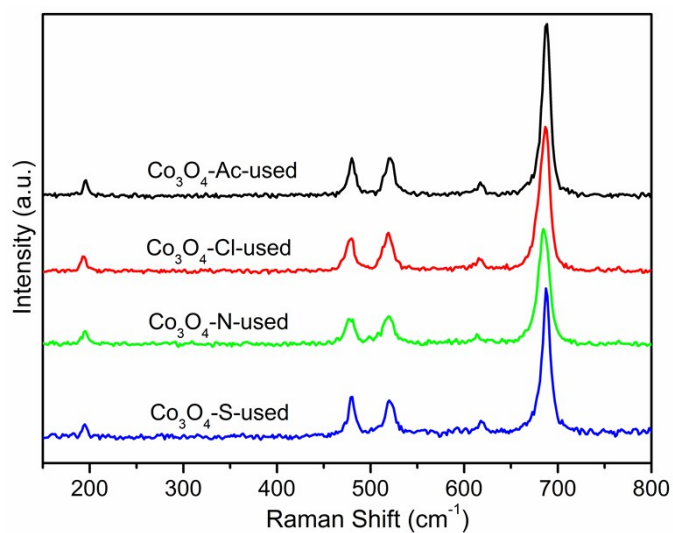

**Fig. S3** Raman spectra of used catalysts (after four consecutive runs) in wavenumber range of 150-800  $\text{cm}^{-1}$
